# Supplementary material
Source: Springer Nature journal article supplement (https://www.springermedizin.de/resource/supplementary/13054_2013_2456_MOESM1_ESM.pdf/9714032)

### Lactate calibration drift

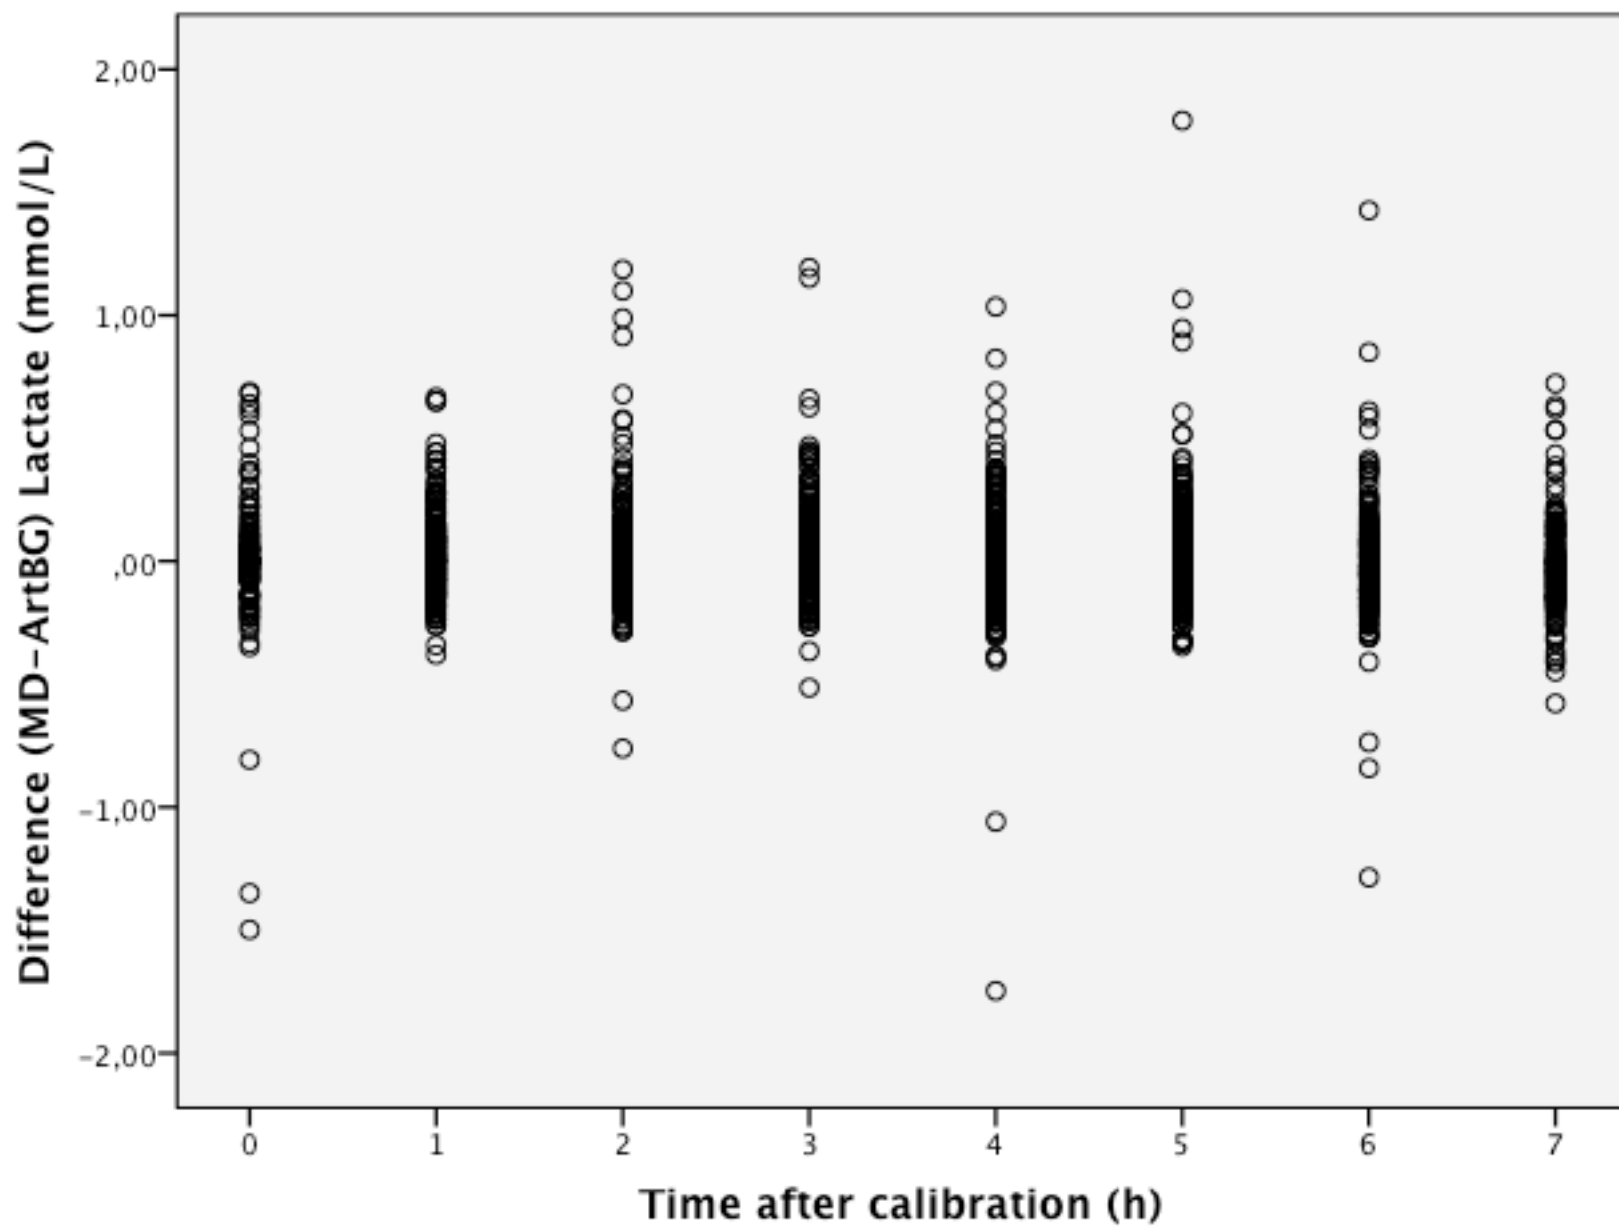

Supplement: MOESM1 [file 9714032]
